# Supplementary material
Source: PubMed Central journal article supplement (PMC7776312)
Supplement: 432_2020_3492_MOESM1_ESM.pdf [file 432_2020_3492_MOESM1_ESM.pdf]

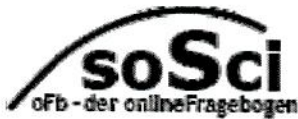

---

Tumorpatienten\_unter\_COVID-19 → base

23.10.2020, 11:29

**Seite 01**

Liebe Patientinnen und Patienten,

wir wissen um Ihre persönliche Erkrankung und die damit verbundenen Sorgen. Die täglichen Nachrichten um Covid-19 haben in den vergangenen Wochen zusätzlich das Leben unserer ganzen Gesellschaft verändert.

Mit diesem Fragebogen möchten wir als Onkologen erfahren, was Covid-19 mit Ihnen – unseren Patienten – macht. Die Fragen sind einfach. Mit Ihren Antworten helfen Sie uns, einen Augenblick einzufangen, den wir hoffentlich alle nie mehr erleben.

Ihre Antworten sollen mit zu einer Diskussion führen, damit die Versorgung von Tumorpatienten in der Zukunft trotz Pandemien auch weiter gut aufrechterhalten kann. Hierfür herzlichen Dank, Ihnen alles Gute für Ihre Zukunft, herzliche Grüße von Ihrer

Arbeitsgemeinschaft "Prävention und Integrative Onkologie" (PRIO) in der Deutschen Krebsgesellschaft

**1. Bitte geben Sie Ihr Alter an.****Ich bin**

- ☐ <30 Jahre alt
- ☐ 31-40 Jahre alt
- ☐ 41-50 Jahre alt
- ☐ 51-60 Jahre alt
- ☐ 61-70 Jahre alt
- ☐ 71-80 Jahre alt
- ☐ >80 Jahre alt

**2. Bitte geben Sie den Ausgangsort des Tumors an.**

- ☐ Prostata
- ☐ Brust
- ☐ Lunge
- ☐ Magen-Darm-Trakt
- ☐ Haut
- ☐ Kopf-Hals-Tumore
- ☐ Lymphdrüsenkrebs
- ☐ Blutkrebs (Leukämie)
- ☐ Knochen
- ☐ Gehirn
- ☐ Andere

**3. Bitte machen Sie Angaben zu Ihrer aktuellen Krankheitssituation.**

- ☐ Mein Krebs ist heilbar.
- ☐ Mein Krebs hat gestreut (metastasiert).
- ☐ Ich bin tumorfrei und in der Tumornachsorge.
- ☐ Ich bin in palliativmedizinischer Betreuung.

**4. Bitte geben Sie an, in welchem Bundesland Sie wohnen.**

- ☐ Baden-Württemberg
- ☐ Bayern
- ☐ Brandenburg
- ☐ Berlin
- ☐ Bremen
- ☐ Hamburg
- ☐ Hessen
- ☐ Mecklenburg-Vorpommern
- ☐ Niedersachsen
- ☐ Nordrhein-Westfalen
- ☐ Rheinland-Pfalz
- ☐ Saarland
- ☐ Sachsen
- ☐ Sachsen-Anhalt
- ☐ Schleswig-Holstein
- ☐ Thüringen

---

**Seite 03****5. Wie sehr schränkt die aktuelle Situation durch den sog. Corona-Virus Ihren Alltag ein?**

Bitte geben Sie entsprechendes an.

sehr      mäßig      wenig      gar nicht

Mich schränkt die aktuelle Situation ein...

☐      ☐      ☐      ☐**6. Wie sehr irritieren bzw. verunsichern Sie die teils unterschiedlichen Aussagen zur Gefahr und des Verlaufes der Corona-Infektion in den öffentlichen Medien?**

Bitte geben Sie entsprechendes an.

sehr groß      mäßig      wenig      gar nicht

Mich verunsichert bzw. irritiert das...

☐      ☐      ☐      ☐

**7. Verspüren Sie aktuell seelische Auswirkungen (wie Schlafstörungen, Ängste, Depression, etc.) durch die Situation mit den eingeschränkten Bewegungsmöglichkeiten, Auflagen und der häuslichen Isolierung?**

Bitte geben Sie entsprechendes an,

|                                             | sehr                  | mäßig                 | wenig                 | gar nicht             |
|---------------------------------------------|-----------------------|-----------------------|-----------------------|-----------------------|
| Ich verspüre aktuell SEELISCHE Auswirkungen | <input type="radio"/> | <input type="radio"/> | <input type="radio"/> | <input type="radio"/> |

**8. Sehen Sie für sich langfristig KÖRPERLICHE Folgen durch die aktuelle Situation mit den eingeschränkten Bewegungsmöglichkeiten, Auflagen und der häuslichen Isolierung?**

Bitte geben Sie entsprechendes ein.

|                                          | sehr groß             | mäßig                 | gering                | gar nicht             |
|------------------------------------------|-----------------------|-----------------------|-----------------------|-----------------------|
| Die KÖRPERLICHEN Folgen sind für mich... | <input type="radio"/> | <input type="radio"/> | <input type="radio"/> | <input type="radio"/> |

**9. Haben Sie Bedenken bezüglich Ihrer aktuell laufenden Behandlung der Krebserkrankung?**

Bitte geben Sie entsprechendes ein.

|                     | sehr groß             | mäßig                 | gering                | gar keine             |
|---------------------|-----------------------|-----------------------|-----------------------|-----------------------|
| Meine Bedenken sind | <input type="radio"/> | <input type="radio"/> | <input type="radio"/> | <input type="radio"/> |

**10. Fürchten Sie aufgrund der Situationen an den Krankenhäusern, dass Ihnen medizinisch notwendige Therapien oder Untersuchungen verweigert oder diese verzögert werden?**

Bitte geben Sie entsprechendes an.

|                          | sehr groß             | mäßig                 | gering                | gar nicht             |
|--------------------------|-----------------------|-----------------------|-----------------------|-----------------------|
| Meine Befürchtungen sind | <input type="radio"/> | <input type="radio"/> | <input type="radio"/> | <input type="radio"/> |

**11. Aktuell dürfen Angehörige und Besucher in den meisten Krankenhäusern keine Patientinnen und Patienten besuchen.**

(1)

**Wenn Sie aktuell STATIONÄR liegen oder während des Besuchsverbotes STATIONÄR lagen: wie sehr hat der geringe und eingeschränkte Kontakt zu Ihnen nahe stehenden Mitmenschen Ihrer Meinung nach einen negativen Einfluss auf Ihren Heilungsverlauf?**

(2)

**Wenn Sie aktuell KEINEN stationären Aufenthalt benötigen: wie sehr glauben Sie, würde der geringe und eingeschränkte Kontakt zu Ihnen nahe stehenden Mitmenschen Ihrer Meinung nach negativen Einfluss auf Ihren Heilungsverlauf haben?**

Bitte geben Sie bitte entsprechendes an.

|                                                                                             | sehr groß             | mäßig                 | gering                | gar nicht             |
|---------------------------------------------------------------------------------------------|-----------------------|-----------------------|-----------------------|-----------------------|
| Ich liege oder lag STATIONÄR, der negative Einfluss durch den eingeschränkte Kontakt ist... | <input type="radio"/> | <input type="radio"/> | <input type="radio"/> | <input type="radio"/> |
| Ich liege NICHT stationär, der negative Einfluss durch den eingeschränkten Kontakt wäre...  | <input type="radio"/> | <input type="radio"/> | <input type="radio"/> | <input type="radio"/> |

**12. Haben Sie ausreichend Möglichkeiten, körperlich aktiv zu sein und sich im Umfeld zu bewegen (Spaziergänge, Garten, Terrasse,...)?**

Bitte geben Sie entsprechendes an.

|                                                   | sehr gut              | mäßig                 | gering                | gar nicht             |
|---------------------------------------------------|-----------------------|-----------------------|-----------------------|-----------------------|
| Meine Möglichkeiten körperlich aktiv zu sein sind | <input type="radio"/> | <input type="radio"/> | <input type="radio"/> | <input type="radio"/> |

**13. Spüren Sie bereits jetzt körperliche Folgen aufgrund der Situation mit den eingeschränkten Bewegungsmöglichkeiten, Auflagen und der häuslichen Isolierung (z.B. zunehmender Muskelverlust, Kraftverlust, Müdigkeit, Schläppheit, fehlender Appetit) ?**

Bitte geben Sie bitte entsprechendes an.

|                                              | sehr                  | mäßig                 | wenig                 | gar nicht             |
|----------------------------------------------|-----------------------|-----------------------|-----------------------|-----------------------|
| Ich spüre bereits die körperlichen Folgen... | <input type="radio"/> | <input type="radio"/> | <input type="radio"/> | <input type="radio"/> |

**14. Welchen Eindruck vermitteln Ärzte/Pflegende auf Sie als Patient?**

Bitte geben Sie entsprechendes an.

|                                                 | 0°C cool              | 36,5°C normal         | 90°C bewegt           | 110°C verbrannt       |
|-------------------------------------------------|-----------------------|-----------------------|-----------------------|-----------------------|
| Die Ärzte/Ärztinnen, Pflegenden wirken auf mich | <input type="radio"/> | <input type="radio"/> | <input type="radio"/> | <input type="radio"/> |

---

**Letzte Seite**

## **Vielen Dank für Ihre Teilnahme!**

Wir möchten uns ganz herzlich für Ihre Mithilfe bedanken.

Ihre Antworten wurden gespeichert, Sie können das Browser-Fenster nun schließen.

---

### **Möchten Sie in Zukunft an interessanten und spannenden Online-Befragungen teilnehmen?**

Wir würden uns sehr freuen, wenn Sie Ihre E-Mail-Adresse für das SoSci Panel anmelden und damit wissenschaftliche Forschungsprojekte unterstützen.

E-Mail:

Die Teilnahme am SoSci Panel ist freiwillig, unverbindlich und kann jederzeit widerrufen werden.

Das SoSci Panel speichert Ihre E-Mail-Adresse nicht ohne Ihr Einverständnis, sendet Ihnen keine Werbung und gibt Ihre E-Mail-Adresse nicht an Dritte weiter.

Sie können das Browserfenster selbstverständlich auch schließen, ohne am SoSci Panel teilzunehmen.

---

Prof. Dr. med. J. Huebner, Arbeitsgemeinschaft Prävention und Integrative Onkologie in der DKG – 2020
