# Supplementary material
Source: PubMed Central journal article supplement (PMC7776312)
Supplement: 432_2020_3492_MOESM2_ESM.pdf [file 432_2020_3492_MOESM2_ESM.pdf]

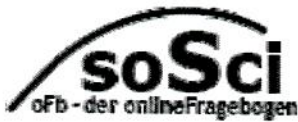

---

PRIO\_COVID19\_Aerzte → base

23.10.2020, 11:22

**Seite 01**

Liebe Kollegen,

die COVID-Pandemie bewegt jeden von uns. Wir fragen uns, was macht dies mit unseren Tumorpatienten, ihrem Versorgungsalltag und mit uns selbst. Bitte helfen Sie uns mit Ihrem Feedback, diese Ausnahmesituation festzuhalten.

Ihre Antworten heute bilden die Grundlage für unsere Diskussionen morgen. In diesem Sinne herzlichen Dank für Ihre Teilnahme. Bleiben Sie gesund, Ihre

AG "Prävention und Integrative Onkologie" (PRIO)

Bitte geben Sie Ihren Tätigkeitsbereich an.

**Ich bin tätig in...**

- ☐ Praxis/Medizinisches Versorgungszentrum
- ☐ Krankenhaus/Klinik- ambulant
- ☐ Krankenhaus/Klinik- stationär
- ☐ Krankenhaus/Klinik- stationär und ambulant

**1. In welchem Bundesland sind Sie tätig?**

Bitte geben Sie an, in welchem Bundesland Sie tätig sind.

**Ich bin tätig in**

- ☐ Baden-Württemberg
- ☐ Bayern
- ☐ Berlin
- ☐ Brandenburg
- ☐ Bremen
- ☐ Hamburg
- ☐ Hessen
- ☐ Mecklenburg-Vorpommern
- ☐ Niedersachsen
- ☐ Nordrhein-Westfalen
- ☐ Rheinland-Pfalz
- ☐ Saarland
- ☐ Sachsen
- ☐ Sachsen-Anhalt
- ☐ Schleswig-Holstein
- ☐ Thüringen

**2. Sind Sie in die Betreuung von Patienten und Patientinnen mit einer akuten COVID-19 Infektion involviert?**

**Ich betreue Patienten und Patientinnen mit einer akuten COVID-19 Infektion**

- ☐ Ja.
- ☐ Nein.

**3. Wie sehr schränkt die aktuelle Situation durch SARS-CoV-2 (COVID-19 Infektion) Ihren beruflichen Alltag ein (Masken/Schutzanzüge, Isolierung, Anrufe, etc.)?**

Bitte geben Sie entsprechendes an.

|                                             | sehr                  | mäßig                 | wenig                 | gar nicht             |
|---------------------------------------------|-----------------------|-----------------------|-----------------------|-----------------------|
| Mich schränkt die aktuelle Situation ein... | <input type="radio"/> | <input type="radio"/> | <input type="radio"/> | <input type="radio"/> |

**4. Wie sehr irritieren bzw. verunsichern Sie die teils unterschiedlichen Aussagen zur Gefahr und des Verlaufes der COVID-19-Infektion in den öffentlichen Medien?**

Bitte geben Sie entsprechendes an.

|                                       | sehr                  | mäßig                 | wenig                 | gar nicht             |
|---------------------------------------|-----------------------|-----------------------|-----------------------|-----------------------|
| Mich irritiert bzw. verunsichert dies | <input type="radio"/> | <input type="radio"/> | <input type="radio"/> | <input type="radio"/> |

**5. Haben Sie viele Rückfragen Ihrer Patienten in Bezug auf eine Infektion mit dem SARS-CoV-2 (COVID-19 Infektion)?**

Bitte geben Sie entsprechendes an.

|                              | sehr viele            | mäßig viele           | wenige                | gar nicht             |
|------------------------------|-----------------------|-----------------------|-----------------------|-----------------------|
| Ich habe Rückfragen erhalten | <input type="radio"/> | <input type="radio"/> | <input type="radio"/> | <input type="radio"/> |

**6. Wie schätzen Sie den Stellenwert der SEELISCHEN Auswirkungen (wie Schlafstörungen, Ängste, Depression, etc.) durch die Situation mit eingeschränkten Bewegungsmöglichkeiten, Auflagen und der häuslichen Isolierung für die Patienten ein?**

Bitte geben sie entsprechendes an.

|                                        | sehr groß             | mäßig                 | wenig                 | weiß nicht            |
|----------------------------------------|-----------------------|-----------------------|-----------------------|-----------------------|
| Die Stärke SEELISCHER Auswirkungen ist | <input type="radio"/> | <input type="radio"/> | <input type="radio"/> | <input type="radio"/> |

**7. Sehen Sie langfristig KÖRPERLICHE Folgen (wie z. B. Sarkopenie, Mangelernährung, Fatigue, etc.) durch die aktuelle Situation mit eingeschränkten Bewegungsmöglichkeiten, Auflagen und der häuslichen Isolierung für Ihre Patienten?**

Bitte geben Sie entsprechendes an.

|                                | sehr viele            | mäßig viele           | wenige                | gar nicht             |
|--------------------------------|-----------------------|-----------------------|-----------------------|-----------------------|
| KÖRPERLICHE Folgen erwarte ich | <input type="radio"/> | <input type="radio"/> | <input type="radio"/> | <input type="radio"/> |

**8. Haben Sie Bedenken in der Fortführung der laufenden Behandlung Ihrer Patienten?**

Bitte geben Sie entsprechendes an.

|                  | sehr viele            | mäßig viele           | wenige                | gar nicht             |
|------------------|-----------------------|-----------------------|-----------------------|-----------------------|
| Bedenke habe ich | <input type="radio"/> | <input type="radio"/> | <input type="radio"/> | <input type="radio"/> |

**9. Benötigen Sie aktuell mehr Zeit und/oder Überzeugungskraft, um Patienten von der Notwendigkeit einer medikamentösen oder Strahlentherapie zu überzeugen?**

Bitte geben Sie entsprechendes an.

|                              | sehr                  | mäßig                 | wenig                 | gar nicht             |
|------------------------------|-----------------------|-----------------------|-----------------------|-----------------------|
| In der adjuvanten Situation  | <input type="radio"/> | <input type="radio"/> | <input type="radio"/> | <input type="radio"/> |
| In der palliativen Situation | <input type="radio"/> | <input type="radio"/> | <input type="radio"/> | <input type="radio"/> |

**10. Erleben Sie, dass es aufgrund der Situation an den Krankenhäusern, schwieriger ist, für medizinisch notwendige Therapien oder Untersuchungen für Ihre Patienten eine Platz/Zeit/Kapazitäten zu bekommen?**

Bitte geben Sie entsprechendes an.

Wenn „ja“, können Sie das durch intensive eigene Bemühungen oder Bemühungen Ihrer Mitarbeiter ausgleichen?

- ☐ ja
- ☐ nein
- ☐ ja, unser Team kann dies ausgleichen
- ☐ weiß nicht

**11. Wie sehr beeinträchtigt Ihrer Meinung nach das Besuchsverbot für Angehörige und Besucher Ihre Patienten?**

Bitte geben Sie entsprechendes an.

|                                          | sehr groß             | mäßig                 | wenig                 | gar nicht             |
|------------------------------------------|-----------------------|-----------------------|-----------------------|-----------------------|
| Beeinträchtigung durch Besuchsverbot ist | <input type="radio"/> | <input type="radio"/> | <input type="radio"/> | <input type="radio"/> |

**12. Wie schätzen Sie den Umgang des überwiegenden Anteiles Ihrer Patienten mit der aktuellen Situation insgesamt ein?**

Bitte geben Sie entsprechendes an.

- ☐ Patienten sind panisch, isolieren sich nahezu komplett.
- ☐ Patienten sind ängstlich, isolieren sich nahezu komplett.
- ☐ Patienten sind verunsichert.
- ☐ Patienten sind entspannt.

**13. Spüren Sie bereits jetzt psychischen Druck bezüglich der Zeit nach den laufenden Maßnahmen (Termine für Nachsorgen, Abklärungen,...)?**

Bitte geben Sie entsprechendes an.

|                                 | sehr                  | mäßig                 | wenig                 | gar nicht             |
|---------------------------------|-----------------------|-----------------------|-----------------------|-----------------------|
| Den psychischen Druck spüre ich | <input type="radio"/> | <input type="radio"/> | <input type="radio"/> | <input type="radio"/> |

**14. Haben Sie aktuell finanzielle Ängste?**

Bitte geben Sie entsprechendes an.

- ☐ ja  
☐ nein

**15. Fürchten Sie psychische oder körperliche Folgen für sich durch die allgemeine Situation mit COVID-19 oder der Behandlung Ihrer Patienten mit dem SARS-CoV-2 (COVID-19-Infektion)?**

Bitte geben Sie entsprechendes an.

- ☐ Ja, überwiegend psychisch  
☐ Ja, überwiegend körperlich  
☐ Ja, psychisch und körperlich  
☐ Nein

**16. Haben Sie Angst um Ihre Gesundheit in Anbetracht der Behandlung von Patienten mit einer COVID-19-Infektion oder teilweise fehlenden Schutzausrüstungen in Praxen und Krankenhäusern?**

Bitte geben Sie entsprechendes an.

- ☐ ja  
☐ nein

**17. Zu guter Letzt...wie emotional erhitzt fühlen Sie sich gerade?**

Bitte geben Sie entsprechendes an.

|                | 0°C cool              | 36,5°C normal         | 90°C bewegt           | 110°C verbrannt       |
|----------------|-----------------------|-----------------------|-----------------------|-----------------------|
| Ich fühle mich | <input type="radio"/> | <input type="radio"/> | <input type="radio"/> | <input type="radio"/> |

---

**Letzte Seite**

## **Vielen Dank für Ihre Teilnahme!**

Wir möchten uns ganz herzlich für Ihre Mithilfe bedanken.

Ihre Antworten wurden gespeichert, Sie können das Browser-Fenster nun schließen.

---

### **Möchten Sie in Zukunft an interessanten und spannenden Online-Befragungen teilnehmen?**

Wir würden uns sehr freuen, wenn Sie Ihre E-Mail-Adresse für das SoSci Panel anmelden und damit wissenschaftliche Forschungsprojekte unterstützen.

E-Mail:

Die Teilnahme am SoSci Panel ist freiwillig, unverbindlich und kann jederzeit widerrufen werden.

Das SoSci Panel speichert Ihre E-Mail-Adresse nicht ohne Ihr Einverständnis, sendet Ihnen keine Werbung und gibt Ihre E-Mail-Adresse nicht an Dritte weiter.

Sie können das Browserfenster selbstverständlich auch schließen, ohne am SoSci Panel teilzunehmen.

---

Prof. Dr. med. J. Hübner, Arbeitsgemeinschaft Prävention und Integrative Onkologie der DKG – 2020
