# Supplementary material
Source: PubMed Central journal article supplement (PMC7776312)
Supplement: 432_2020_3492_MOESM3_ESM.pdf [file 432_2020_3492_MOESM3_ESM.pdf]

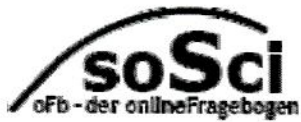

---

PRIO\_COVID19\_Pflege → base

23.10.2020, 11:25

**Seite 01**

Liebe Kolleginnen und Kollegen,

die COVID-Pandemie bewegt jeden von uns. Wir fragen uns, was macht dies mit unseren Tumorpatienten, ihrem Versorgungsalltag und mit uns selbst. Bitte helfen Sie uns mit Ihrem Feedback, diese Ausnahmesituation festzuhalten.

Ihre Antworten heute bilden die Grundlage für unsere Diskussionen morgen. In diesem Sinne herzlichen Dank für Ihre Teilnahme. Bleiben Sie gesund, Ihre

AG "Prävention und Integrative Onkologie" (PRIO)

**1. In welcher Funktion sind Sie tätig?**

Bitte geben Sie entsprechendes an.

**Ich bin tätig als**

- ☐ Kranken- und Gesundheitspfleger/ Kranken- und Gesundheitspflegerin
- ☐ Kranken- und Gesundheitspfleger/ Kranken- und Gesundheitspflegerin, Fachweiterbildung Onkologie
- ☐ Medizinische(r) Fachangestellte (r)
- ☐ Sozialarbeiter / Therapeuten

**2. In welchem Bereich sind Sie tätig?**

Bitte geben Sie entsprechendes an.

**Ich bin tätig...**

- ☐ Praxis/Medizinisches Versorgungszentrum/ ambulante Versorgung
- ☐ Krankenhaus/Klinik-ambulant
- ☐ Krankenhaus/Klinik-stationär
- ☐ Krankenhaus/Klinik ambulant und stationär
- ☐ Sonstiges

**3. In welchem Bundesland sind Sie tätig?**

Bitte geben Sie an, in welchem Bundesland Sie tätig sind.

**Ich bin tätig in**

- ☐ Baden-Württemberg
- ☐ Bayern
- ☐ Berlin
- ☐ Brandenburg
- ☐ Bremen
- ☐ Hamburg
- ☐ Hessen
- ☐ Mecklenburg-Vorpommern
- ☐ Niedersachsen
- ☐ Nordrhein-Westfalen
- ☐ Rheinland-Pfalz
- ☐ Saarland
- ☐ Sachsen
- ☐ Sachsen-Anhalt
- ☐ Schleswig-Holstein
- ☐ Thüringen

**4. Sind Sie in die Betreuung von Patienten und Patientinnen mit einer akuten COVID-19 Infektion involviert?**

Bitte geben Sie entsprechendes an.

**Ich betreue Patienten und Patientinnen mit einer akuten COVID-19 Infektion**

- ☐ Ja.
- ☐ Nein.

---

**Seite 03****5. Wie sehr schränkt die aktuelle Situation durch SARS-CoV-2 (COVID-19 Infektion) Ihren beruflichen Alltag ein (Masken/Schutzanzüge, Isolierung, Anrufe, etc.)?**

Bitte geben Sie entsprechendes an.

sehr      mäßig      wenig      gar nicht

Mich schränkt die aktuelle Situation ein...

☐      ☐      ☐      ☐**6. Haben Sie viele Rückfragen Ihrer Patienten in Bezug auf eine Infektion mit dem SARS-CoV-2 (COVID-19 Infektion)?**

Bitte geben Sie entsprechendes an.

sehr viele      mäßig viele      wenige      gar nicht

Ich habe Rückfragen erhalten

☐      ☐      ☐      ☐**7. Wie sehr irritieren bzw. verunsichern Sie die teils unterschiedlichen Aussagen zur Gefahr und des Verlaufes der COVID-19-Infektion in den öffentlichen Medien?**

Bitte geben Sie entsprechendes an.

sehr      mäßig      wenig      gar nicht

Mich irritiert bzw. verunsichert dies

☐      ☐      ☐      ☐

**8. Wie hoch schätzen Sie den Anteil der Patienten ein, die sich Gedanken machen, eine Therapie nicht zu beginnen oder sie abubrechen?**

Bitte geben Sie entsprechendes an.

|                                           | 0%                    | 1-10%                 | 11-25%                | 26-50%                | >50%                  |
|-------------------------------------------|-----------------------|-----------------------|-----------------------|-----------------------|-----------------------|
| Bei den kurativen/adjuvanten Patienten... | <input type="radio"/> |
| bei den palliativen Patienten...          | <input type="radio"/> |

**9. Wie schätzen Sie den Stellenwert der SEELISCHE Auswirkungen (wie Schlafstörungen, Ängste, Depression, etc.) durch die Situation mit eingeschränkten Bewegungsmöglichkeiten, Auflagen und der häuslichen Isolierung für die Patienten ein?**

Bitte geben Sie entsprechendes an.

|                                             | sehr groß             | mäßig                 | wenig                 | gar nicht             |
|---------------------------------------------|-----------------------|-----------------------|-----------------------|-----------------------|
| Die SEELISCHE Auswirkungen halte ich für... | <input type="radio"/> | <input type="radio"/> | <input type="radio"/> | <input type="radio"/> |

**10. Erleben Sie, dass es aufgrund der Situation an den Krankenhäusern, schwieriger ist, für medizinisch notwendige Therapien oder Untersuchungen für Ihre Patienten eine Platz/Zeit/Kapazitäten zu bekommen?**

Bitte geben Sie entsprechendes an.

Falls „ja“, können Sie das durch intensive eigene Bemühungen oder Bemühungen Ihrer Mitarbeiter ausgleichen?

- ☐ Ja.  
☐ Ja, das kann ich/ können wir ausgleichen.  
☐ Nein.  
☐ Weiß nicht.

**11. Wie sehr beeinträchtigt das Besuchsverbot für Angehörige und Besucher Ihre Patienten Ihrer Meinung nach?**

Bitte geben Sie entsprechendes an.

|                                                                       | sehr                  | mäßig                 | wenig                 | gar nicht             | betreue<br>keine<br>ambulanter<br>Patienten |
|-----------------------------------------------------------------------|-----------------------|-----------------------|-----------------------|-----------------------|---------------------------------------------|
| Das Besuchsverbot beeinträchtigt die Patienten meiner Meinung nach... | <input type="radio"/>                       |

**12. Haben Sie finanzielle Ängste?**

Bitte geben Sie entsprechendes an.

- ☐ Ja.  
☐ Nein.

**13. Fürchten Sie psychische oder körperliche Folgen für sich durch die allgemeine Situation mit COVID-19 oder der Behandlung Ihrer Patienten mit SARS-CoV-2?**

Bitte geben Sie entsprechendes an.

- ☐ Ja, überwiegend psychisch.  
☐ Ja, überwiegend körperlich.  
☐ Ja, psychisch und körperlich.  
☐ Nein.

**14. Haben Sie Angst um Ihre Gesundheit in Anbetracht der Behandlung von Patienten mit einer COVID-19-Infektion oder teilweise fehlenden Schutzausrüstungen in Praxen und Krankenhäusern?**

Bitte geben Sie entsprechendes an.

- ☐ Ja.  
☐ Nein.

**15. Spüren Sie bereits jetzt psychischen Druck bezüglich der Zeit nach den laufenden Maßnahmen (Termine für Operationen, Nachsorge, Praxisbetrieb, stationäre Aufnahme...)?**

Bitte geben Sie entsprechendes an.

- |                                            | sehr                  | mäßig                 | wenig                 | gar nicht             |
|--------------------------------------------|-----------------------|-----------------------|-----------------------|-----------------------|
| Ich spüre den psychischen Druck bereits... | <input type="radio"/> | <input type="radio"/> | <input type="radio"/> | <input type="radio"/> |

**16. Zu guter Letzt, wie emotional erhitzt fühlen Sie sich gerade?**

Bitte geben Sie entsprechendes an.

- |                       | 0°C cool              | 36,5°C normal         | 90°C bewegt           | 110°C verbrannt       |
|-----------------------|-----------------------|-----------------------|-----------------------|-----------------------|
| Ich fühle mich wie... | <input type="radio"/> | <input type="radio"/> | <input type="radio"/> | <input type="radio"/> |

---

**Letzte Seite**

## **Vielen Dank für Ihre Teilnahme!**

Wir möchten uns ganz herzlich für Ihre Mithilfe bedanken.

Ihre Antworten wurden gespeichert, Sie können das Browser-Fenster nun schließen.

---

### **Möchten Sie in Zukunft an interessanten und spannenden Online-Befragungen teilnehmen?**

Wir würden uns sehr freuen, wenn Sie Ihre E-Mail-Adresse für das SoSci Panel anmelden und damit wissenschaftliche Forschungsprojekte unterstützen.

E-Mail:

Die Teilnahme am SoSci Panel ist freiwillig, unverbindlich und kann jederzeit widerrufen werden.

Das SoSci Panel speichert Ihre E-Mail-Adresse nicht ohne Ihr Einverständnis, sendet Ihnen keine Werbung und gibt Ihre E-Mail-Adresse nicht an Dritte weiter.

Sie können das Browserfenster selbstverständlich auch schließen, ohne am SoSci Panel teilzunehmen.

---

Prof. Dr. med. Jutta Huebner, Arbeitsgemeinschaft Prävention und Integrative Onkologie der DKG – 2020
