# Supplementary material
Source: PubMed Central journal article supplement (PMC7776312)
Supplement: 432_2020_3492_MOESM4_ESM.pdf [file 432_2020_3492_MOESM4_ESM.pdf]

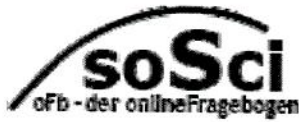

---

COVID-19\_Seelsorge\_Psycho → base

23.10.2020, 11:17

**Seite 01**

Liebe Kolleginnen und Kollegen,

die COVID-Pandemie bewegt jeden von uns. Wir fragen uns, was macht dies mit unseren Tumorpatienten, ihrem Versorgungsalltag und mit uns selbst. Bitte helfen Sie uns mit Ihrem Feedback, diese Ausnahmesituation festzuhalten.

Ihre Antworten heute bilden die Grundlage für unsere Diskussionen morgen. In diesem Sinne herzlichen Dank für Ihre Teilnahme. Bleiben Sie gesund, Ihre

AG "Prävention und Integrative Onkologie" (PRIO)

**1. In welcher Berufsgruppe sind Sie tätig?**

Bitte geben Sie entsprechendes an.

**Ich bin tätig als**

- ☐ Seelsorge
- ☐ Psychoonkologie
- ☐ Psychosoziale Beratungsstelle

**2. In welchem Bereich sind Sie tätig?**

Bitte geben Sie entsprechendes an.

**Ich bin tätig...**

- ☐ Krankenhaus mit Onkologie
- ☐ Gemeinde
- ☐ Hospiz/ Palliative Care
- ☐ Psychosoziale Beratungsstelle

**3. In welchem Bundesland sind Sie tätig?**

Bitte geben Sie an, in welchem Bundesland Sie tätig sind.

**Ich bin tätig in**

- ☐ Baden-Württemberg
- ☐ Bayern
- ☐ Berlin
- ☐ Brandenburg
- ☐ Bremen
- ☐ Hamburg
- ☐ Hessen
- ☐ Mecklenburg-Vorpommern
- ☐ Niedersachsen
- ☐ Nordrhein-Westfalen
- ☐ Rheinland-Pfalz
- ☐ Saarland
- ☐ Sachsen
- ☐ Sachsen-Anhalt
- ☐ Schleswig-Holstein
- ☐ Thüringen

**4. Sind Sie in die Betreuung von Patienten und Patientinnen mit einer akuten COVID-19 Infektion involviert?**

Bitte geben Sie entsprechendes an.

**Ich betreue Patienten und Patientinnen mit einer akuten COVID-19 Infektion**

- ☐ Ja.  
☐ Nein.

---

**Seite 03****5. Wie sehr schränkt die aktuelle Situation durch SARS-CoV-2 (COVID-19 Infektion) Ihren beruflichen Alltag ein (Masken/Schutzanzüge, Isolierung, Anrufe, etc.)?**

Bitte geben Sie entsprechendes an.

|                                             | sehr                  | mäßig                 | wenig                 | gar nicht             |
|---------------------------------------------|-----------------------|-----------------------|-----------------------|-----------------------|
| Mich schränkt die aktuelle Situation ein... | <input type="radio"/> | <input type="radio"/> | <input type="radio"/> | <input type="radio"/> |

**6. Haben Sie viele Rückfragen Ihrer Patienten in Bezug auf eine Infektion mit dem SARS-CoV-2 (COVID-19 Infektion)?**

Bitte geben Sie entsprechendes an.

|                              | sehr viele            | mäßig viele           | wenige                | gar nicht             |
|------------------------------|-----------------------|-----------------------|-----------------------|-----------------------|
| Ich habe Rückfragen erhalten | <input type="radio"/> | <input type="radio"/> | <input type="radio"/> | <input type="radio"/> |

**7. Wie sehr irritieren bzw. verunsichern Sie die teils unterschiedlichen Aussagen zur Gefahr und des Verlaufes der COVID-19-Infektion in den öffentlichen Medien?**

Bitte geben Sie entsprechendes an.

|                                       | sehr                  | mäßig                 | wenig                 | gar nicht             |
|---------------------------------------|-----------------------|-----------------------|-----------------------|-----------------------|
| Mich irritiert bzw. verunsichert dies | <input type="radio"/> | <input type="radio"/> | <input type="radio"/> | <input type="radio"/> |

**8. Wie hoch schätzen Sie den Anteil der Patienten ein, die sich Gedanken machen, eine Therapie nicht zu beginnen oder sie abubrechen?**

Bitte geben Sie entsprechendes an.

|                                           | 0%                    | 1-10%                 | 11-25%                | 26-50%                | >50%                  |
|-------------------------------------------|-----------------------|-----------------------|-----------------------|-----------------------|-----------------------|
| Bei den kurativen/adjuvanten Patienten... | <input type="radio"/> |
| bei den palliativen Patienten...          | <input type="radio"/> |

**9. Wie schätzen Sie den Stellenwert der seelischen Auswirkungen (wie Schlafstörungen, Ängste, Depression, etc.) durch die Situation mit eingeschränkten Bewegungsmöglichkeiten, Auflagen und der häuslichen Isolierung für die Patienten ein?**

Bitte geben Sie entsprechendes an.

|                                             | sehr groß             | mäßig                 | wenig                 | gar nicht             |
|---------------------------------------------|-----------------------|-----------------------|-----------------------|-----------------------|
| Die SEELISCHE Auswirkungen halte ich für... | <input type="radio"/> | <input type="radio"/> | <input type="radio"/> | <input type="radio"/> |

**10. Erleben Sie, dass es aufgrund der Situation an den Krankenhäusern, schwieriger ist, für medizinisch notwendige Therapien oder Untersuchungen für Ihre Patienten eine Platz/Zeit/Kapazitäten zu bekommen?**

Bitte geben Sie entsprechendes an.

Falls „ja“, können Sie das durch intensive eigene Bemühungen oder Bemühungen Ihrer Mitarbeiter ausgleichen?

- ☐ Ja.
- ☐ Ja, das kann ich/ können wir ausgleichen.
- ☐ Nein.
- ☐ Weiß nicht.

**11. Wie sehr beeinträchtigt das Besuchsverbot für Angehörige und Besucher Ihre Patienten Ihrer Meinung nach?**

Bitte geben Sie entsprechendes an.

|                                                                       | sehr                  | mäßig                 | wenig                 | gar nicht             |
|-----------------------------------------------------------------------|-----------------------|-----------------------|-----------------------|-----------------------|
| Das Besuchsverbot beeinträchtigt die Patienten meiner Meinung nach... | <input type="radio"/> | <input type="radio"/> | <input type="radio"/> | <input type="radio"/> |

**12. Fürchten Sie psychische oder körperliche Folgen für sich durch die allgemeine Situation mit COVID-19 oder der Behandlung Ihrer Patienten mit SARS-CoV-2?**

Bitte geben Sie entsprechendes an.

- ☐ Ja, überwiegend psychisch.  
☐ Ja, überwiegend körperlich.  
☐ Ja, psychisch und körperlich.  
☐ Nein.

**13. Haben Sie Angst um Ihre Gesundheit in Anbetracht der Behandlung von Patienten mit einer COVID-19-Infektion oder teilweise fehlenden Schutzausrüstungen in Praxen und Krankenhäusern?**

Bitte geben Sie entsprechendes an.

- ☐ Ja.  
☐ Nein.

**14. Wie ist aus Ihrer Beobachtung der gefühlte Belastungszustand der anderen Berufsgruppen, die in der Patientenversorgung involviert sind?**

Orientieren Sie sich bitte an unserem Thermometer

| 0°C Cool              | 36,5°C Normal         | 90°C Erhitzt          | 110°C Ausgebrannt     |
|-----------------------|-----------------------|-----------------------|-----------------------|
| <input type="radio"/> | <input type="radio"/> | <input type="radio"/> | <input type="radio"/> |

Ich spüre den psychischen Druck bereits...

**15. Aber auch, wie emotional erhitzt fühlen Sie sich gerade?**

Bitte geben Sie entsprechendes an.

| 0°C cool              | 36,5°C normal         | 90°C bewegt           | 110°C verbrannt       |
|-----------------------|-----------------------|-----------------------|-----------------------|
| <input type="radio"/> | <input type="radio"/> | <input type="radio"/> | <input type="radio"/> |

Ich fühle mich wie...

## Spezieller Teil Seelsorge / Psychoonkologie

Im Folgenden möchten wir Ihre Geduld noch ein wenig strapazieren und wenige ergänzende Fragen zu Ihrer speziellen Tätigkeit stellen, um diesen Bereich der onkologischen Versorgung unter Covid-19 gemeinsam besser erfassen zu können:

**16. Wie viele Gespräche haben Sie seit Anfang März mit onkologischen Patienten oder deren Familien geführt?**

Bitte geben Sie entsprechend an

- ☐ 0 – 5  
☐ 6 -10  
☐ 11 – 20  
☐ 21 – 50  
☐ 51 -100  
☐ >100

**17. Wie viele Gespräche haben sie im Durchschnitt mit einem Patienten/einer Familie geführt?**

Bitte geben Sie entsprechend an

- ☐ 1  
☐ 2  
☐ 3 – 5  
☐ 6 – 10  
☐ >10

**18. Haben sich die Gespräche im Vergleich zu der Zeit vor Corona verändert?**

Bitte geben Sie entsprechendes an.

|                                  | Ja                    | Nein                  | Weiß nicht            |
|----------------------------------|-----------------------|-----------------------|-----------------------|
| Im Inhalt                        | <input type="radio"/> | <input type="radio"/> | <input type="radio"/> |
| In der Dauer                     | <input type="radio"/> | <input type="radio"/> | <input type="radio"/> |
| In der Intensität                | <input type="radio"/> | <input type="radio"/> | <input type="radio"/> |
| In der Belastung für mich selbst | <input type="radio"/> | <input type="radio"/> | <input type="radio"/> |

**19. Ist Ihre Arbeit im Umgang mit Patienten in diesem Zeitraum organisatorisch erschwert gewesen?**

Bitte geben Sie entsprechendes an.

- ☐ Ja  
☐ Nein  
☐ Teils- teils.

**20. Falls Sie die letzte Frage (organisatorisch erschwerte Arbeitsbedingungen) mit „Ja“ oder „Teils-teils“ beantwortet haben, geben Sie bitte mögliche Gründe an.**

Bitte geben Sie entsprechendes an.

- ☐ Hygieneeinschränkungen  
☐ Besuchsverbot im Krankenhaus  
☐ Allgemeine Kontaktsperre  
☐ Individuelle Einschränkungen

☐ Sonstige

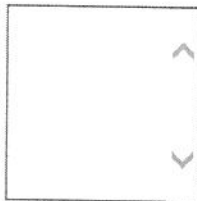

**21. Haben Sie digitale Angebote ((Video-) Telefonie, Chats, etc...) als Hilfe empfunden?**

Bitte geben Sie entsprechendes an.

- ☐ Ja  
☐ Nein  
☐ Teils-teils

**22. Welche Bedeutung hat COVID-19 direkt in diesen Gesprächen?**

Bitte geben Sie entsprechendes an.

|                      | groß                  | mittel                | klein                 | gar nicht             |
|----------------------|-----------------------|-----------------------|-----------------------|-----------------------|
| Die Bedeutung ist... | <input type="radio"/> | <input type="radio"/> | <input type="radio"/> | <input type="radio"/> |

**23. Hat COVID-19 indirekt einen Einfluss in den Gesprächen?**

Bitte geben Sie entsprechendes an.

|                     | groß                  | mittel                | klein                 | keinen                |
|---------------------|-----------------------|-----------------------|-----------------------|-----------------------|
| Der Einfluss ist... | <input type="radio"/> | <input type="radio"/> | <input type="radio"/> | <input type="radio"/> |

**24. Können Sie diesen indirekten Einfluss von COVID-19 beschreiben?**

|  |
|--|
|  |
|  |
|  |

**25. Zu guter Letzt, lassen Sie uns noch einmal auf die seelischen/psychischen Auswirkungen für unsere Patienten zurückkommen. Worin äußert sich diese nach Ihrer Beobachtung?**

- ☐ Anspannung
- ☐ Sorge
- ☐ Hoffnung
- ☐ Verzweiflung
- ☐ Traurigkeit
- ☐ Alleinsein
- ☐ Angst
- ☐ Mut
- ☐ Zuversicht
- ☐ Diskussionsbedarf
- ☐ Positives Denken

---

Letzte Seite

## Vielen Dank für Ihre Teilnahme!

Wir möchten uns ganz herzlich für Ihre Mithilfe bedanken.

Ihre Antworten wurden gespeichert, Sie können das Browser-Fenster nun schließen.

---

### Möchten Sie in Zukunft an interessanten und spannenden Online-Befragungen teilnehmen?

Wir würden uns sehr freuen, wenn Sie Ihre E-Mail-Adresse für das SoSci Panel anmelden und damit wissenschaftliche Forschungsprojekte unterstützen.

E-Mail:

Am Panel teilnehmen

Die Teilnahme am SoSci Panel ist freiwillig, unverbindlich und kann jederzeit widerrufen werden.

Das SoSci Panel speichert Ihre E-Mail-Adresse nicht ohne Ihr Einverständnis, sendet Ihnen keine Werbung und gibt Ihre E-Mail-Adresse nicht an Dritte weiter.

Sie können das Browserfenster selbstverständlich auch schließen, ohne am SoSci Panel teilzunehmen.

---

Prof. Dr. med. Jutta Huebner, Arbeitsgemeinschaft Prävention und Integrative Onkologie der DKG – 2020
